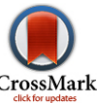

## Correction

# Correction: Mining Rare Associations between Biological Ontologies

The PLOS ONE Staff

There is an error in the first equation. Please see the corrected Equation 1 here.

$$SupExp = \begin{cases} 1) p_a * p_b, \text{ if } a, b \in \text{roots} \\ 2) p_{ab} * \frac{p_a}{p_a}, \text{ if } a \notin \text{roots and } b \in \text{roots} \\ 3) p_{ab} * \frac{p_b}{p_b}, \text{ if } a \in \text{roots and } b \notin \text{roots} \\ 4) p_{ab} * \frac{p_a}{p_a} * \frac{p_b}{p_b}, \text{ otherwise} \end{cases} \quad (1)$$

## Reference

1. Benites F, Simon S, Sapozhnikova E (2014) Mining Rare Associations between Biological Ontologies. PLoS ONE 9(1): e84475. doi:10.1371/journal.pone.0084475

**Citation:** The PLOS ONE Staff (2014) Correction: Mining Rare Associations between Biological Ontologies. PLoS ONE 9(7): e103663. doi:10.1371/journal.pone.0103663

**Published:** July 25, 2014

**Copyright:** © 2014 The PLOS ONE Staff. This is an open-access article distributed under the terms of the Creative Commons Attribution License, which permits unrestricted use, distribution, and reproduction in any medium, provided the original author and source are credited.
